# Supplementary material for: In situ electro-polymerization of nitrogen doped carbon dots and their application in an electrochemiluminescence biosensor for the detection of intracellular lead ions
Source: Royal Society of Chemistry journal article supplement (doi:10.1039/c6cc01078d), 2016-01-01
Supplement: c6cc01078d1.pdf [file c6cc01078d1.pdf]

## Electronic Supplementary Information

### In Situ Electro-polymerization of Nitrogen doped Carbon Dots and Its Application in Electrochemiluminescence Biosensor for the Detection of Intracellular Lead Ion

Chengyi Xiong,<sup>1</sup> Wenbin Liang,<sup>1,2</sup> Yingning Zheng,<sup>1</sup> Haijun Wang,<sup>1</sup> Ying Zhuo,<sup>1</sup> Yaqin  
Chai<sup>\*,1</sup>, Ruo Yuan<sup>\*,1</sup>

#### Experimental

##### Reagents and material

Potassium persulfate ( $K_2S_2O_8$ ) and ascorbic acid (AA) were purchased from Kelong Chemical Company (Chengdu, China). Potassium tetrachloropalladate ( $K_2PdCl_4$ ) and gold chloride tetrahydrate ( $HAuCl_4 \cdot 4H_2O$ ) were obtained from Kangda Company (Shanghai, China). Silver nitrate ( $AgNO_3$ ), o-phenylenediamine (OPD), lead nitrate ( $Pb(NO_3)_2$ ), trisodium citrate dihydrate and ( $Na_3C_6H_5O_7 \cdot 2H_2O$ ), cetylpyridinium chloride monohydrate (CPC), hexanethiol (HT) were obtained from Sigma Chemical Co. (St. Louis, MO, USA). Phosphate buffer solutions (PBS) with pH 7.4 were prepared by mixing standard stock solutions of 0.1 M  $K_2HPO_4$ , 0.1 M  $NaH_2PO_4$ , and 0.1 M KCl and adjusting the pH with 0.1 M HCl or NaOH, then diluting with ultrapure water. All chemicals were of analytical grade and used without further purification. Hela cells were provided by the cell bank of the Committee on Type Culture Collection of Chinese Academy of Science (Shanghai, China). All

1 solution was prepared with ultrapure water and stored in the refrigerator (4 °C). The  
 2 DNA probes were synthesized by Sangon, Inc. (Shanghai, China). The nucleotide  
 3 sequences are listed in Table S1.

4 **Table S1** Sequence information for the nucleic acids used in this study

| name                                     | sequences*(5'-3')                                                    |
|------------------------------------------|----------------------------------------------------------------------|
| <b>capture DNA (T<sub>1</sub>)</b>       | NH <sub>2</sub> -ATC GAA AAT                                         |
| <b>complementary DNA (T<sub>2</sub>)</b> | GGG GAT TTT CGA T-NH <sub>2</sub>                                    |
| <b>ssDNA1 (S<sub>1</sub>)</b>            | GGG TGG GTG GGT GGG TAG AAT TGT ACT TAA<br>ACA CCT T-NH <sub>2</sub> |
| <b>ssDNA2 (S<sub>2</sub>)</b>            | GGG TGG GTG GGT GGG TAA GGT GTT TAA GTA<br>CAA TTC T-NH <sub>2</sub> |

5

## 6 Apparatus

7 The ECL intensity was monitored by a model MPI-A electrochemiluminescence  
 8 analyzer (Xi'An Remax Electronic Science & Technology Co. Ltd., Xi'An, China).  
 9 The voltage of the photomultiplier tube (PMT) was set at 800 V. The ECL spectrum  
 10 was obtained from a model MPI-E II electrochemiluminescence analyzer (Xi'An  
 11 Remax Electronic Science & Technology Co. Ltd., Xi'An, China) by collecting the  
 12 maximum ECL intensity during the cyclic potential sweep with a series of optical  
 13 filters that ranged from 250 to 800 nm. And the scan rate was 0.1 V/s in ECL  
 14 detection. Cyclic voltammetric (CV) measurements were carried out with a CHI 660D  
 15 electrochemistry workstation (Shanghai CH Instruments, China). The concentration of  
 16 Pb<sup>2+</sup> in cell lysis buffer was calibrated by inductively coupled plasma mass  
 17 spectrometry (ICP-MS, 7500ce, Agilent, USA). A three-electrode electrochemical cell

1 was composed of a modified glass carbon electrode (GCE,  $\Phi = 4$  mm) as the working  
2 electrode, an Ag/AgCl (sat. KCl) as the reference electrode and a platinum wire as the  
3 auxiliary electrode. GCE, platinum wire and AgCl electrode were obtained from  
4 Tianjin Aidahengsheng technology Co. Ltd., China. The morphologies of different  
5 nanomaterial were characterized by scanning electron microscopy (SEM, S-4800,  
6 Hitachi, Tokyo, Japan) at an acceleration voltage of 5.0 kV and transmission electron  
7 micrograph (TEM) at Tecnai G2 F20 microscope (FEI Co. U.S.A). The UV-vis  
8 absorption spectrum were recorded on a UV-2550 spectrophotometer (Shimadzu,  
9 Japan). X-ray photoelectron spectroscopy (XPS) characterization was carried out  
10 using a VG Scientific ESCALAB 250 spectrometer (Thermoelectricity Instruments,  
11 USA) with AlK $\alpha$  X-rays (1486.6 eV) as the light source.

## 12 **Synthesis of Ag nanoparticles**

13 Ag nanoparticles (AgNPs) were synthesized by a previous literature with a little  
14 modification.<sup>1</sup> Firstly, AgNO<sub>3</sub> aqueous solution (0.5 mL, 0.01 M) and trisodium  
15 citrate dehydrate aqueous solution (1 mL, 0.03 M) were added into ultrapure water (4  
16 °C, 48.5 mL). Then, NaBH<sub>4</sub> solution (1.79 mg/mL) was added into the mixture with  
17 magnetic stirring. When the color of the solution turned into yellow, AgNPs were  
18 well formed.

## 19 **Preparation of convex Pd@Au HOHs**

20 Pd@Au HOHs were prepared according to a previous literature with some minor  
21 modification.<sup>2</sup> Firstly, cubic Pd seeds (PdNCs) with size of 22 nm were synthesized  
22 by a simple method. Briefly, 5 mL of K<sub>2</sub>PdCl<sub>4</sub> solution (10 mM) was added into 9.42

1 mL CTAB (12.5 mM) solution. The mixture was kept heating at 95 °C for 5 min with  
2 stirring. Then, 80 mL of AA (100 mM) solution was added into the hot mixture and  
3 the mixture was kept stirring for 20 min. The obtained PdNCs were purified by  
4 centrifuging and washing with CPC aqueous and finally dispersed into 10 mL CPC (5  
5 mM) solution. The Pd@Au HOHs were synthesized by a previous report. Initially, 25  
6 mL of CPC (5 mM) solution was heated at 30 °C for 10 min. After that, 500 µL of the  
7 obtained PdNCs, 720 µL of AA (100 mM) and 1500 µL H<sub>2</sub>AuCl<sub>4</sub> (10 mM) were added  
8 to CPC solution under stirring respectively. The color of CPC solution turned into  
9 yellow and finally became orange pink within several minutes, which mean the  
10 Pd@Au HOHs were well prepared. The Pd@Au HOHs were collected by  
11 centrifugation and washed with ultrapure water two times. Finally, the obtained  
12 Pd@Au HOHs were dispersed in 1.5 mL of ultrapure water.

### 13 **Preparation of Pd@Au HOHs-T<sub>2</sub>-S<sub>1</sub> and Pd@Au HOHs-S<sub>2</sub> bioconjugates**

14 Briefly, 800 µL of S<sub>1</sub> (2.5 µM) and 200 µL of T<sub>2</sub> (2.5 µM) were added into 500 µL  
15 of the obtained Pd@Au HOHs solution with stirring for 12 h. After this step, amino-  
16 modified S<sub>1</sub> and amino-modified T<sub>2</sub> could be immobilized on Pd@Au HOHs to form  
17 Pd@Au HOHs-T<sub>2</sub>-S<sub>1</sub> through Au-N bond. The Pd@Au HOHs-S<sub>2</sub> bioconjugates were  
18 prepared through similar methods. 800 µL of S<sub>2</sub> (2.5 µM) were added into 500 µL of  
19 the obtained Pd@Au HOHs solution with stirring for 12 h to form Pd@Au HOHs-S<sub>2</sub>  
20 bioconjugates. The obtained bioconjugates were stored at 4 °C before used.

### 21 **Cell culture and cell lysis buffer preparation**

22 Helix cells were cultured in DMEM medium supplemented with 10% fetal calf

1 serum containing different concentration of  $\text{Pb}^{2+}$ . And the Hela cells were maintained  
2 at 37 °C in a humidified atmosphere (95% air and 5%  $\text{CO}_2$ ). Cells were collected in  
3 the exponential phase and washed twice with ice-cold sterile PBS. After that,  $10^6$  cells  
4 were resuspended in 1 mL of ice-cold sterile water and stored in 2 mL EP tube. Then,  
5 the cells were repeatedly frozen and thawed to prepare cell lysis buffer. The cell lysis  
6 was used immediately for detection or frozen at -80 °C.

### 7 **Fabrication of the ECL biosensor**

8 The ECL biosensor was fabricated by the following steps. Initially, the GCE was  
9 polished with 0.3  $\mu\text{m}$  and 0.05  $\mu\text{m}$  alumina powder slurry. After being washed with  
10 ultrapure water, the GCE was sonicated in ethanol and ultrapure water respectively  
11 and dried with nitrogen at room temperature. For electrodepositing of N-CDs, the  
12 electrode was immersed in 3 mL of OPD solution (10 mM) for cyclic voltammetric  
13 (CV) reaction. The scanning was performed between 0 and 0.6 V at a rate of  $50 \text{ mV}^{-1}$   
14 for 10 cycles. After that, the N-CDs were deposited on the surface of electrode. Then,  
15 16  $\mu\text{L}$  of AgNPs were dropped onto the GCE and incubated for 12 h. Through Ag-N  
16 bond, AgNPs were immobilized on the amino groups of N-CDs. Subsequently, 16  $\mu\text{L}$   
17 of amino modified  $\text{T}_1$  (2.5  $\mu\text{M}$ ) were dropped onto the GCE and incubated for 12 h to  
18 immobilize on the AgNPs through Ag-N bond. Afterward, the modified electrode  
19 ( $\text{T}_1/\text{AgNPs}/\text{N-CDs}/\text{GCE}$ ) was incubated in HT (1 mM) at room temperature to block  
20 the nonspecific binding sites ( $\text{HT}/\text{T}_1/\text{AgNPs}/\text{N-CDs}/\text{GCE}$ ). Finally, 8  $\mu\text{L}$  of  $\text{Pd@Au}$   
21  $\text{HOHs-T}_2\text{-S}_1$  and 8  $\mu\text{L}$  of  $\text{Pd@Au HOHs-S}_2$  were dropped onto the GCE and  
22 incubated for 4 h at room temperature. With the chain hybridization between  $\text{T}_1$  and

1 T<sub>2</sub>, Pd@Au HOHs-T<sub>2</sub>-S<sub>1</sub> was modified on the electrode. Meanwhile, Pd@Au HOHs-  
2 DNA dendrimers were formed on the electrode through the chain hybridization  
3 between S<sub>1</sub> and S<sub>2</sub> (Pd@Au HOHs-DNA dendrimers/HT/T<sub>1</sub>/AgNPs/N-CDs/GCE).  
4 Through these steps, the ECL biosensor was well prepared and stored in the  
5 refrigerator at 4 °C for further use. After every modified step, ultrapure water was  
6 utilized to wash the GCE to remove physically absorbed species.

## 7 **Measurement Procedure**

8 Firstly, 16 µL of cell lysis buffer were heated 90 °C for 5 min and allowed for  
9 slow cooling down to room temperature in 1 h. Then, 16 µL of prepared cell lysis  
10 buffer were incubated on the electrode at room temperature for 2 h to form Pb<sup>2+</sup>-  
11 stabilized G-quadruplex (G4). With the forming of Pb<sup>2+</sup>-stabilized G-quadruplex (G4),  
12 the ECL intensity of N-CDs was quenched by Pb<sup>2+</sup>. After incubation, the modified  
13 GCE (Pb<sup>2+</sup>/Pd@Au HOHs-DNA dendrimers/HT/T<sub>1</sub>/AgNPs/N-CDs/GCE) was rinsed  
14 with ultrapure water to remove the extra reagents. To measure the ECL response, a  
15 conventional three electrode system that used the modified GCE as the working  
16 electrode, Ag/AgCl (saturated KCl) as the reference electrode and a platinum wire as  
17 auxiliary electrode was investigated in 3 mL of .01 M PBS (pH = 7.4) containing 0.1  
18 M K<sub>2</sub>S<sub>2</sub>O<sub>8</sub>. Under CV mode, the working potential scanned from -2.0 to 0 V at a  
19 scanning rate of 100 mV/s.

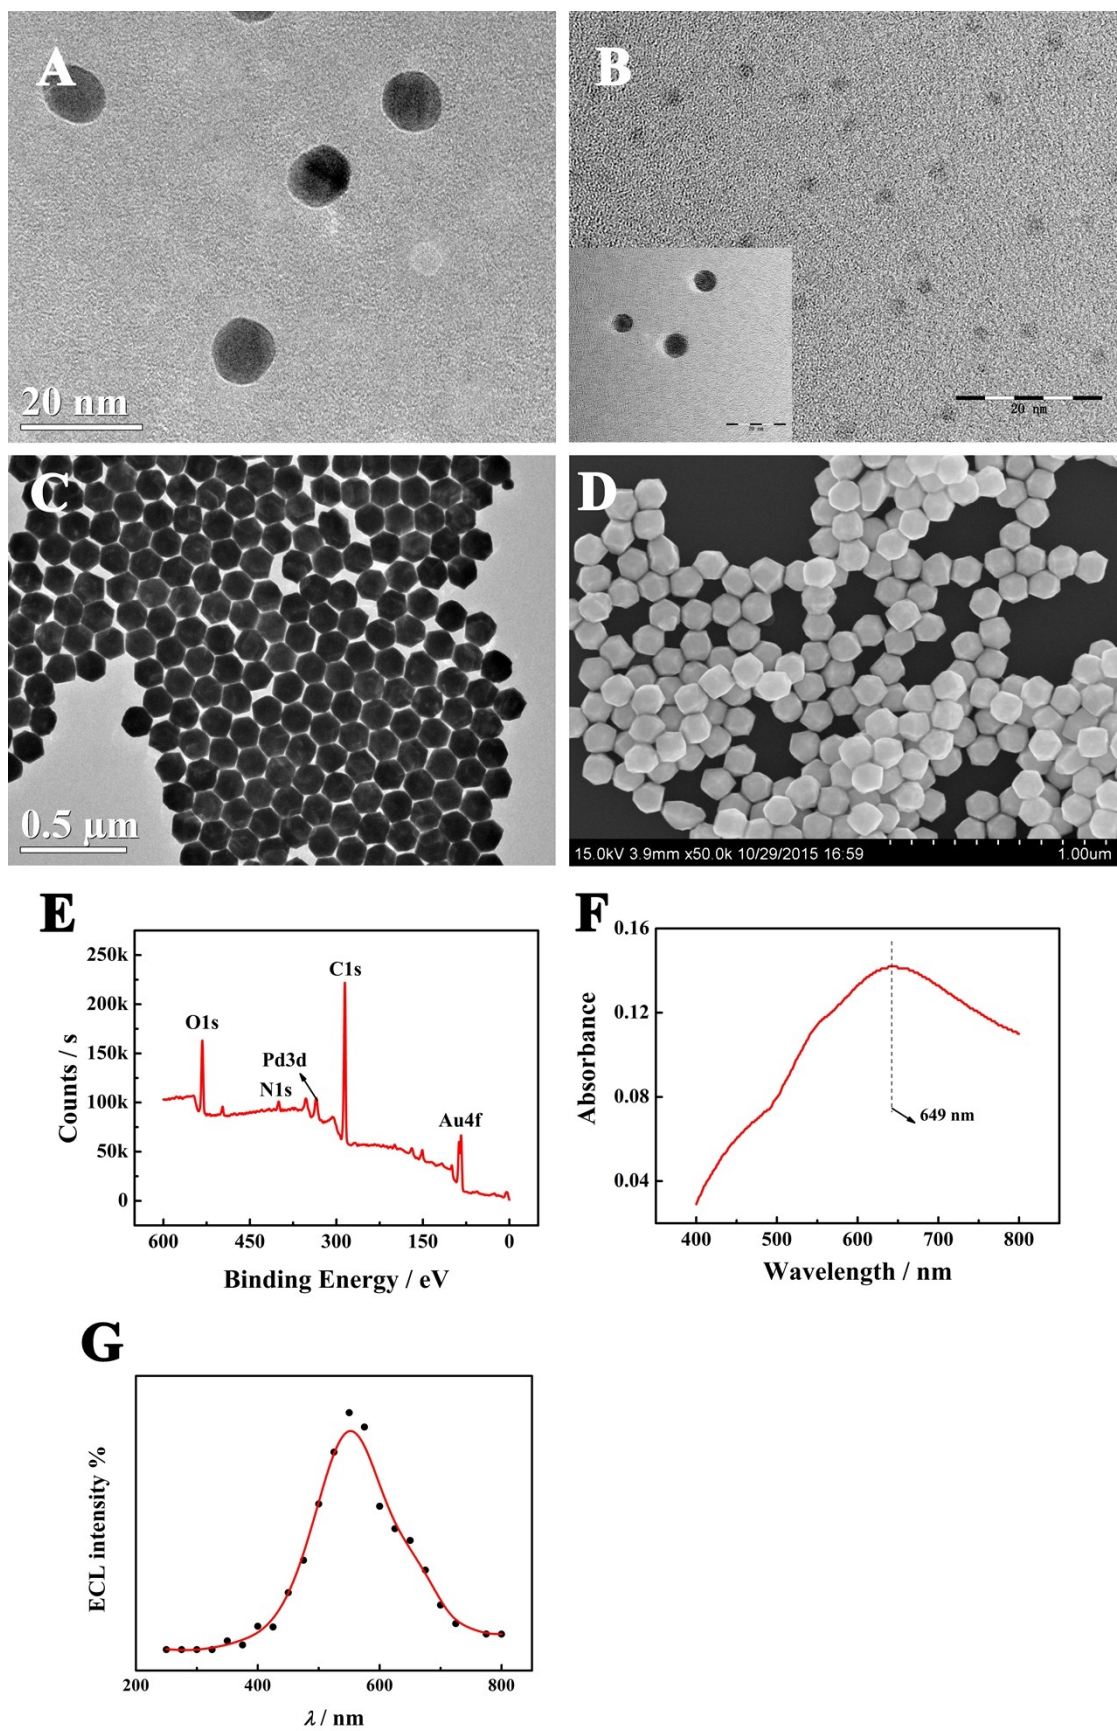

1

2 **Fig. S1** (A) TEM image of AgNPs. (B) TEM image of N-CDs. (C) TEM image and (D) SEM

1 image of Pd@Au HOHs. (E) Full region XPS for Pd@Au HOHs. (F) UV-vis absorption spectra of  
 2 Pd@Au HOHs. (G) ECL spectrum of N-CDs.

3

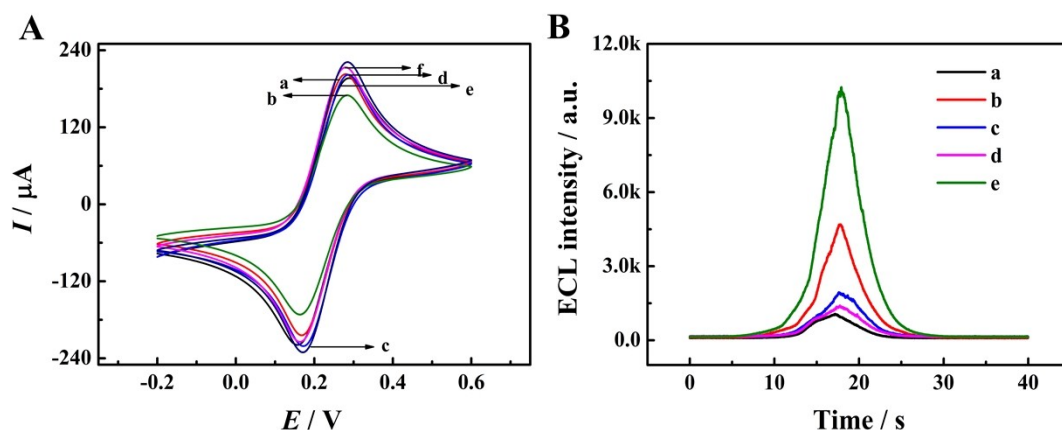

4

5 **Fig. S2** (A) Cyclic voltammograms at a) bare GCE, b) N-CDs/GCE, c) AgNPs/N-CDs/GCE, d) T<sub>1</sub>/  
 6 AgNPs/N-CDs/GCE, e) HT/T<sub>1</sub>/AgNPs/N-CDs/GCE and f) Pd@HOHs-DNA  
 7 dendrimers/HT/T<sub>1</sub>/AgNPs/N-CDs/GCE in 5.0 mM [Fe(CN)<sub>6</sub>]<sup>3-/4-</sup> containing 0.1 M KCl by  
 8 scanning the potential from -0.2 to 0.6 V at a scan rate of 0.1 Vs<sup>-1</sup>. (B) ECL-time profiles of a) N-  
 9 CDs/GCE, b) AgNPs/N-CDs/GCE, c) T<sub>1</sub>/AgNPs/N-CDs/GCE, d) HT/T<sub>1</sub>/AgNPs/N-CDs/GCE and  
 10 e) Pd@HOHs-DNA dendrimers/HT/T<sub>1</sub>/AgNPs/N-CDs/GCE in 0.1 M PBS (pH 7.4) with a  
 11 scanning potential from 0 to -2 V and at a scan rate of 100 mV s<sup>-1</sup>.

12

### 13 References

- 14 1 L. Q. Zheng, X. D. Yu, J. J. Xu and H. Y. Chen, *Chem. Commun.*, 2015, **51**, 1050-  
 15 1053.
- 16 2 L. Zhang, W. X. Niu, W. Y. Gao, L. M. Qi, J. P. Lai, J. M. Zhao and G. B. Xu,  
 17 *ACS nano*, 2014, **8**, 5953-5958.
